# Supplementary material for: MoCA Domain-Specific Pattern of Cognitive Impairment in Stroke Patients Attending Intensive Inpatient Rehabilitation: A Prospective Study
Source: MDPI journal article supplement (doi:10.3390/bs14010042), 2024-01-09
Supplement: s1 [file s1]

## Supplementary materials

**Table S1.** Evaluation tools in the RIPS study.

| <i>Area of competence</i>              | <i>Evaluation tool</i>                                               | <i>Acronym</i> |
|----------------------------------------|----------------------------------------------------------------------|----------------|
| <i>Clinical and nursing complexity</i> | Cumulative Illness Rating Scale                                      | CIRS           |
|                                        | Markers of complexity                                                | /              |
|                                        | Functional Oral Intake Scale/water swallow test                      | FOIS           |
|                                        | Numeric Pain Scale/pain assessment in advanced dementia              | NRS            |
|                                        |                                                                      | PAINAD         |
|                                        | Hospital Anxiety Depression Scale                                    | HADS           |
|                                        | Stroke Aphasia Depression Questionnaire                              | SADQ-10        |
| <i>Neurological profile</i>            | National Institutes of Health Stroke Scale                           | NIHSS          |
|                                        | Trial of Organization in Acute Stroke Treatment                      | TOAST          |
|                                        | Oxfordshire Community Stroke Project                                 | OCSF           |
| <i>Functional evaluation</i>           | Trunk Control Test                                                   | TCT            |
|                                        | Fulg-Meyer Assessment scale                                          | FMA            |
|                                        | Short Physical Performance Battery                                   | SPPB           |
|                                        | Modified Barthel Index                                               | MBI            |
|                                        | Modified Rankin scale                                                | MRS            |
|                                        | Scale of disability in communication                                 | SDC            |
|                                        | Functional Ambulation Categories                                     | FAC            |
|                                        | Medical Research Council scale                                       | MRC            |
|                                        | Activity of Daily Living disabilities: Frenchay Activity Index       | FAI            |
|                                        | Activity of Daily Living disabilities: Functional Walking Categories | FWC            |
| <i>Neuropsychological evaluation</i>   | Montreal Cognitive Assessment                                        | MoCA           |
|                                        | Oxford Cognitive Screening                                           | OCS            |

**Table S2.** Comparisons among included and excluded samples.

| <i>Variables</i>           | <i>Included sample (N=67)</i>                                                             | <i>Excluded sample (N=167)</i>                                                              | <i>p-value</i>   |
|----------------------------|-------------------------------------------------------------------------------------------|---------------------------------------------------------------------------------------------|------------------|
| Age (years)                | 76.0 [16.0]                                                                               | 82.0 [12.0]                                                                                 | <b>0.002</b>     |
| Gender                     | Male: 35 (52.2%)<br>Female: 32 (47.8%)                                                    | Male: 81 (48.5%)<br>Female: 86 (51.5%)                                                      | 0.665            |
| Education (years)          | 8.00 [8.00]                                                                               | 8.00 [8.00]                                                                                 | 0.211            |
| Time from the event (days) | 11.0 [9.00]                                                                               | 11.0 [9.0]                                                                                  | 0.492            |
| Type of stroke             | Ischemic: 49 (73.1%)<br>Haemorrhagic: 18 (26.9%)                                          | Ischemic: 136 (81.4%)<br>Haemorrhagic: 31 (18.6%)                                           | 0.213            |
| Side of stroke             | Right: 35 (52.2%)<br>Left: 24 (35.8%)<br>Bilateral: 6 (9.0%)                              | Right: 63 (40.6%)<br>Left: 82 (52.9%)<br>Bilateral: 10 (6.5%)                               | 0.091            |
| Area of the lesion         | None: 4 (6.0%)<br>Supratentorial: 52 (77.6%)<br>Subtentorial: 8 (11.9%)<br>Both: 3 (4.5%) | None: 14 (8.4%)<br>Supratentorial: 132 (79.0%)<br>Subtentorial: 16 (9.6%)<br>Both: 5 (3.0%) | 0.803            |
| NIHSS score                | 5.00 [6.00]                                                                               | 8.00 [9.00]                                                                                 | <b>&lt;0.001</b> |
| MBI score                  | 37.0 [45.0]                                                                               | 19.0 [38.0]                                                                                 | <b>&lt;0.001</b> |
| MoCA dichotomised          | Normal: 34 (50.7%)<br>Altered: 33 (49.3%)                                                 | Normal: 19 (24.4%)<br>Altered: 59 (75.6%)                                                   | <b>0.003</b>     |
| Length of stay (days)      | 32.0 [20.0]                                                                               | 30.5 [29.0]                                                                                 | 0.358            |

**Table S3.** Description of medications and medical history at baseline.

| <i>Variables</i>                                                                                                                                                                                                                                                                                                                                                                                         | <i>Included sample (N=67)</i>     |
|----------------------------------------------------------------------------------------------------------------------------------------------------------------------------------------------------------------------------------------------------------------------------------------------------------------------------------------------------------------------------------------------------------|-----------------------------------|
| <i>Medications</i>                                                                                                                                                                                                                                                                                                                                                                                       |                                   |
| Antidepressive medications                                                                                                                                                                                                                                                                                                                                                                               | Yes: 27 (40.3%)<br>No: 40 (59.7%) |
| Antiepileptic medications                                                                                                                                                                                                                                                                                                                                                                                | Yes: 10 (14.9%)<br>No: 57 (85.1%) |
| Anti-parkinsonian medications                                                                                                                                                                                                                                                                                                                                                                            | Yes: 0 (0%)<br>No: 67 (100%)      |
| Antidepressive and antiepileptic medications                                                                                                                                                                                                                                                                                                                                                             | Yes: 3 (4.5%)<br>No: 64 (65.5%)   |
| <i>Medical history (Cumulative Illness Rating Scale – CIRS)</i><br>1: No problem<br>2: Minor current problem or significant history<br>3: Morbidity or moderate discomfort, requiring treatment<br>4: Severe problem, constant significant discomfort, chronic problem difficult to control<br>5: Extremely severe problem, requiring immediate treatment, organ failure or severe functional impairment |                                   |

|                        |                                                                              |
|------------------------|------------------------------------------------------------------------------|
| Cardiac                | 1: 37(55.2%)<br>2: 10 (14.9%)<br>3: 16 (23.9%)<br>4: 3 (4.5%)<br>5: 1 (1.5%) |
| Hypertension           | 1: 20 (29.9%)<br>2: 6 (9.0%)<br>3: 40 (59.7%)<br>4: 1 (1.5%)<br>5: 0 (0%)    |
| Vascular               | 1: 42 (62.7%)<br>2: 5 (7.5%)<br>3: 17 (25.4%)<br>4: 2 (3.0%)<br>5: 1 (1.5%)  |
| Respiratory            | 1: 57 (81.1%)<br>2: 7 (10.4%)<br>3: 2 (3.0%)<br>4: 1 (1.5%)<br>5: 0 (0%)     |
| Oculistic              | 1: 57 (85.1%)<br>2: 7 (10.4%)<br>3: 2 (3.0%)<br>4: 1 (1.5%)<br>5: 0 (0%)     |
| Gastroenteric inferior | 1: 55 (82.1%)<br>2: 9 (13.4%)<br>3: 2 (3.0%)<br>4: 1 (1.5%)<br>5: 0 (0%)     |
| Gastroenteric superior | 1: 62 (92.5%)<br>2: 4 (6.0%)<br>3: 1 (1.5%)<br>4: 0 (0%)<br>5: 0 (0%)        |
| Liver                  | 1: 62 (92.5%)<br>2: 5 (7.5%)<br>3: 0 (0%)<br>4: 0 (0%)<br>5: 0 (0%)          |
| Kidney                 | 1: 61 (91.0%)<br>2: 6 (9.0%)<br>3: 0 (0%)<br>4: 0 (0%)<br>5: 0 (0%)          |
| Genitourinary          | 1: 49 (73.1%)<br>2: 10 (14.9%)<br>3: 8 (11.9%)                               |

|                                       |                                                                             |
|---------------------------------------|-----------------------------------------------------------------------------|
|                                       | 4: 0 (0%)<br>5: 0 (0%)                                                      |
| Muscles, bones, skin                  | 1: 52 (77.6%)<br>2: 12 (17.9%)<br>3: 3 (4.5%)<br>4: 0 (0%)<br>5: 0 (0%)     |
| Central and peripheral nervous system | 1: 42 (62.7%)<br>2: 6 (9.0%)<br>3: 17 (25.4%)<br>4: 1 (1.5%)<br>5: 1 (1.5%) |
| Endocrine                             | 1: 37 (55.2%)<br>2: 5 (6.0%)<br>3: 26 (38.8%)<br>4: 0 (0%)<br>5: 0 (0%)     |
| Psychiatric                           | 1: 54 (80.6%)<br>2: 4 (6.0%)<br>3: 9 (13.4%)<br>4: 0 (0%)<br>5: 0 (0%)      |
